# Supplementary material for: A solid-state NMR investigation of single-source precursors for group 12 metal selenides; M[N(iPr2PSe)2]2(M = Zn, Cd, Hg)
Source: Royal Society of Chemistry journal article supplement (doi:10.1039/b712011g), 2007-10-22
Supplement: b712011g.pdf [file b712011g.pdf]

## Supplementary Information

Table A. Theoretical phosphorus chemical shift tensors for  $M[N(^1\text{Pr}_2\text{PSe})_2]_2$  ( $M = \text{Zn}, \text{Cd}, \text{Hg}$ )

| $M^{\text{II}}$ | $\delta_{\text{iso}}$<br>ppm | $\delta_{11}$<br>ppm | $\delta_{22}$<br>ppm | $\delta_{33}$<br>ppm |
|-----------------|------------------------------|----------------------|----------------------|----------------------|
| Zn              | 98.7                         | 137.8                | 103.1                | 55.3                 |
|                 | 97.3                         | 136.3                | 99.2                 | 56.3                 |
|                 | 95.3                         | 132.6                | 97.3                 | 56.0                 |
|                 | 95.2                         | 131.5                | 98.1                 | 55.9                 |
| Cd              | 100.5                        | 140.2                | 100.1                | 61.4                 |
|                 | 96.8                         | 137.7                | 94.3                 | 58.6                 |
|                 | 93.2                         | 135.4                | 86.0                 | 58.2                 |
|                 | 88.6                         | 128.3                | 89.0                 | 48.4                 |
| Hg              | 96.5                         | 138.3                | 90.9                 | 60.2                 |
|                 | 93.0                         | 132.2                | 94.2                 | 52.4                 |
|                 | 92.4                         | 131.0                | 91.0                 | 55.1                 |
|                 | 91.8                         | 131.1                | 88.6                 | 55.7                 |

Table B. Theoretical selenium chemical shift tensors for  $M[N(^i\text{Pr}_2\text{PSe})_2]_2$  ( $M = \text{Zn}, \text{Cd}, \text{Hg}$ )

| $M^{\text{II}}$ | $\delta_{\text{iso}}$<br>ppm | $\delta_{11}$<br>ppm | $\delta_{22}$<br>ppm | $\delta_{33}$<br>ppm |
|-----------------|------------------------------|----------------------|----------------------|----------------------|
| Zn              | -291                         | 138                  | -444                 | -566                 |
|                 | -292                         | 136                  | -434                 | -578                 |
|                 | -292                         | 153                  | -445                 | -584                 |
|                 | -293                         | 135                  | -443                 | -572                 |
| Cd              | -320                         | 161                  | -424                 | -696                 |
|                 | -337                         | 153                  | -452                 | -712                 |
|                 | -341                         | 133                  | -455                 | -702                 |
|                 | -348                         | 117                  | -460                 | -703                 |
| Hg              | -235                         | 183                  | -375                 | -515                 |
|                 | -243                         | 183                  | -372                 | -540                 |
|                 | -246                         | 188                  | -393                 | -535                 |
|                 | -249                         | 175                  | -393                 | -530                 |

Table C. Theoretical cadmium and mercury magnetic shielding tensors for  $M[N(^1\text{Pr}_2\text{PSe})_2]_2$  ( $M = \text{Cd}, \text{Hg}$ )

| $M^{II}$ | $\sigma_{\text{iso}}$<br>ppm | $\sigma_{11}$<br>ppm | $\sigma_{22}$<br>ppm | $\sigma_{33}$<br>ppm |
|----------|------------------------------|----------------------|----------------------|----------------------|
| Cd       | 2809                         | 2798                 | 2801                 | 2828                 |
| Hg       | 5463                         | 5417                 | 5438                 | 5534                 |

Table D. Traceless phosphorus chemical shift tensors for  $M[N(^1Pr_2PSe)_2]_2$  ( $M = Zn, Cd, Hg$ )

| $M^{II}$ |      | $\delta_{iso}$<br>ppm | $\delta_{11}$<br>ppm | $\delta_{22}$<br>ppm | $\delta_{33}$<br>ppm |       |
|----------|------|-----------------------|----------------------|----------------------|----------------------|-------|
| Zn       | Expt | 0                     | 20.3                 | 5.7                  | -25.9                |       |
|          |      | 0                     | 20.4                 | 6.6                  | -27.0                |       |
|          |      | 0                     | 24.0                 | 5.7                  | -29.7                |       |
|          |      | 0                     | 22.1                 | 5.9                  | -27.9                |       |
|          | Calc | 0                     | 39.1                 | 4.4                  | -43.4                |       |
|          |      | 0                     | 39.0                 | 1.9                  | -41.0                |       |
|          |      | 0                     | 37.3                 | 2.0                  | -39.3                |       |
|          |      | 0                     | 36.3                 | 2.9                  | -39.3                |       |
|          | Cd   | Expt                  | 0                    | 20.3                 | 4.4                  | 24.7  |
|          |      |                       | 0                    | 20.8                 | 4.7                  | -25.4 |
| 0        |      |                       | 22.2                 | 3.9                  | -26.2                |       |
| 0        |      |                       | 21.9                 | 5.0                  | -26.9                |       |
| Calc     |      | 0                     | 39.7                 | -0.4                 | -39.1                |       |
|          |      | 0                     | 40.9                 | -2.5                 | -38.2                |       |
|          |      | 0                     | 42.2                 | -7.2                 | -35.0                |       |
|          |      | 0                     | 39.7                 | 0.4                  | -40.2                |       |
| Hg       |      | Expt                  | 0                    | 21.2                 | 4.1                  | -25.2 |
|          |      |                       | 0                    | 21.2                 | 4.1                  | -25.3 |
|          | 0    |                       | 23.5                 | 3.3                  | -26.9                |       |
|          | 0    |                       | 22.6                 | 4.9                  | -27.6                |       |
|          | Calc | 0                     | 41.8                 | -5.6                 | -36.3                |       |
|          |      | 0                     | 39.2                 | 1.2                  | -40.6                |       |
|          |      | 0                     | 38.6                 | -1.4                 | -37.3                |       |
|          |      | 0                     | 39.3                 | -3.2                 | -36.1                |       |

Table E. Traceless selenium chemical shift tensors for  $M[N(^i\text{Pr}_2\text{PSe})_2]_2$  ( $M = \text{Zn}, \text{Cd}, \text{Hg}$ )

| $M^{II}$ |      | $\delta_{\text{iso}}$<br>ppm | $\delta_{11}$<br>ppm | $\delta_{22}$<br>ppm | $\delta_{33}$<br>ppm |      |
|----------|------|------------------------------|----------------------|----------------------|----------------------|------|
| Zn       | Expt | 0                            | 420                  | -174                 | -247                 |      |
|          |      | 0                            | 420                  | -151                 | -269                 |      |
|          |      | 0                            | 403                  | -155                 | -247                 |      |
|          |      | 0                            | 439                  | -159                 | -279                 |      |
|          | Calc | 0                            | 429                  | -153                 | -275                 |      |
|          |      | 0                            | 428                  | -142                 | -286                 |      |
|          |      | 0                            | 445                  | -153                 | -292                 |      |
|          |      | 0                            | 428                  | -150                 | -279                 |      |
|          | Cd   | Expt                         | 0                    | 438                  | -114                 | -324 |
|          |      |                              | 0                    | 436                  | -98                  | -338 |
|          |      |                              | 0                    | 444                  | -101                 | -344 |
|          |      |                              | 0                    | 444                  | -101                 | -344 |
|          |      | Calc                         | 0                    | 481                  | -104                 | -376 |
|          |      |                              | 0                    | 490                  | -115                 | -375 |
| 0        |      |                              | 474                  | -114                 | -361                 |      |
| 0        |      |                              | 465                  | -112                 | -355                 |      |
| Hg       |      | Expt                         | 0                    | 405                  | -122                 | -283 |
|          |      |                              | 0                    | 407                  | -118                 | -290 |
|          | 0    |                              | 404                  | -121                 | -284                 |      |
|          | 0    |                              | 426                  | -130                 | -295                 |      |
|          | Calc | 0                            | 418                  | -140                 | -280                 |      |
|          |      | 0                            | 426                  | -129                 | -297                 |      |
|          |      | 0                            | 434                  | -147                 | -289                 |      |
|          |      | 0                            | 424                  | -144                 | -281                 |      |

Table F. Traceless cadmium and mercury chemical shift tensors for  $M[N(^i\text{Pr}_2\text{PSe})_2]_2$  ( $M = \text{Cd}, \text{Hg}$ )

| $M^{II}$ |      | $\delta_{\text{iso}}$<br>ppm | $\delta_{11}$<br>ppm | $\delta_{22}$<br>ppm | $\delta_{33}$<br>ppm |
|----------|------|------------------------------|----------------------|----------------------|----------------------|
| Cd       | Expt | 0                            | 54                   | 34                   | -89                  |
|          | Calc | 0                            | 11                   | 8                    | -19                  |
| Hg       | Expt | 0                            | 296                  | 226                  | -522                 |
|          | Calc | 0                            | 46                   | 25                   | -71                  |
